# Supplementary material
Source: HighWire-hosted journal article supplement (https://bmjopen.bmj.com/content/10/11/e041730)
Supplement: inline-supplementary-material-3 [file inline-supplementary-material-3.pdf]

## Supplementary File\_Appendix 3: Data extraction form template

## Scoping review\_data extraction form

Reviewer: CS ☐ WL ☐ RG ☐ KOH ☐ KAYO ☐

|           |                                                                          |  |
|-----------|--------------------------------------------------------------------------|--|
| Reference | Title                                                                    |  |
|           | Author(s)                                                                |  |
|           | Year of publication                                                      |  |
|           | Journal                                                                  |  |
|           | Origin/Country of origin<br>(where the study was published or conducted) |  |
|           | Study design type (RCT, scoping review, other)                           |  |

|              |                                                                                                               |  |
|--------------|---------------------------------------------------------------------------------------------------------------|--|
| Participants | Setting (Hospital, rehabilitation centre etc.)                                                                |  |
|              | Study population and sample size (Intervention population sample and control population sample) if applicable |  |
|              | Health conditions of the population                                                                           |  |
|              | Duration of the study                                                                                         |  |

|  |                                        |     |
|--|----------------------------------------|-----|
|  | Type of technology (app, website etc.) |     |
|  |                                        | Yes |

|                 |                                            |                                                                                                                        |
|-----------------|--------------------------------------------|------------------------------------------------------------------------------------------------------------------------|
| Technology/ App | Is the technology available in the market? | <input type="checkbox"/> Write, if possible, under which name and where:<br><br>No<br>Write, if possible, the reasons: |
|                 |                                            |                                                                                                                        |

Page 1 of 2

## Supplementary File\_Appendix 3: Data extraction form template

|          |                                                                                                                                                     |                     |
|----------|-----------------------------------------------------------------------------------------------------------------------------------------------------|---------------------|
|          | Characteristics of goal setting function                                                                                                            |                     |
|          | Who is technology for? (patient group, service ...)                                                                                                 |                     |
|          | For which category of disability is the technology for? (generic, specific pathological condition such as diabetes)                                 |                     |
|          | Is the technology for selfmanagement or does it require a therapist?                                                                                |                     |
|          | Theoretical foundation: Theory about how the goal setting process is meant to work If any. (ex. social cognitive theory, Locke and Latham's theory) |                     |
| Outcomes | Main outcomes measures (if applicable):                                                                                                             | Primary outcomes:   |
|          |                                                                                                                                                     | Secondary outcomes: |
| Results: |                                                                                                                                                     |                     |

|                          |  |
|--------------------------|--|
| Additional notes if any: |  |
|--------------------------|--|
